# Supplementary material for: Spatial arrangement of block copolymer nanopatterns using a photoactive homopolymer substrate
Source: Royal Society of Chemistry journal article supplement (doi:10.1039/c9na00095j), 2019-01-01
Supplement: c9na00095j1.pdf [file c9na00095j1.pdf]

# Spatial Arrangement of Block Copolymer Nanopatterns Using Photoactive Homopolymer Interfaces

Zhen Jiang,<sup>a</sup> Md Mahbub Alam,<sup>a</sup> Han-Hao Cheng,<sup>c</sup> Idriss Blakey<sup>a</sup> and Andrew K. Whittaker<sup>a,b</sup>

<sup>1</sup>Australian Institute for Bioengineering and Nanotechnology, The University of Queensland, St Lucia, 4072, Australia. <sup>2</sup>ARC Centre of Excellence in Convergent Bio-Nano Science and Technology, The University of Queensland, St Lucia, 4072, Australia. <sup>3</sup>Australian National Fabrication Facility-QLD Node, The University of Queensland, St Lucia, 4072, Australia.

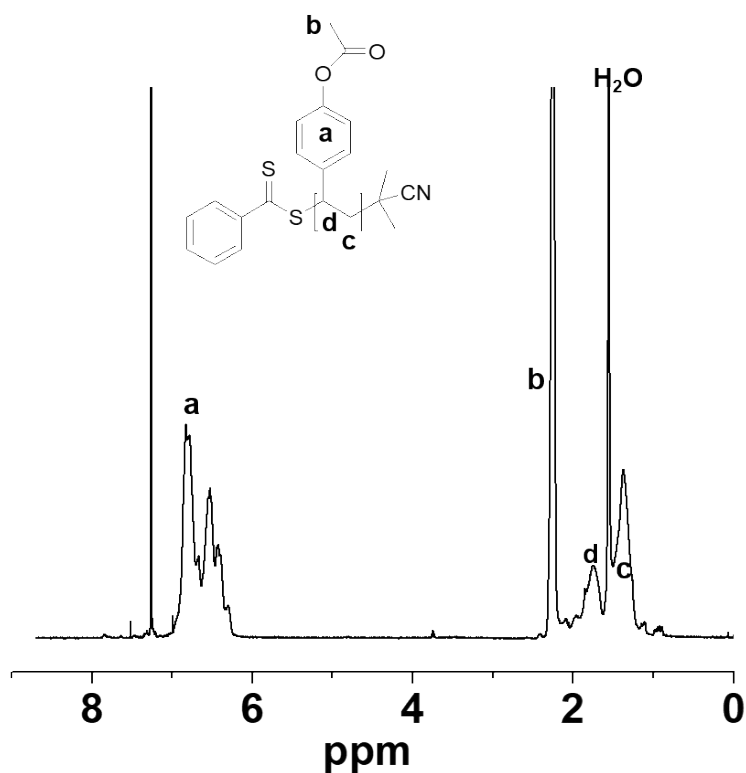

**Figure S1.** <sup>1</sup>H NMR spectrum of poly(4-acetoxystyrene) in deuteriochloroform.

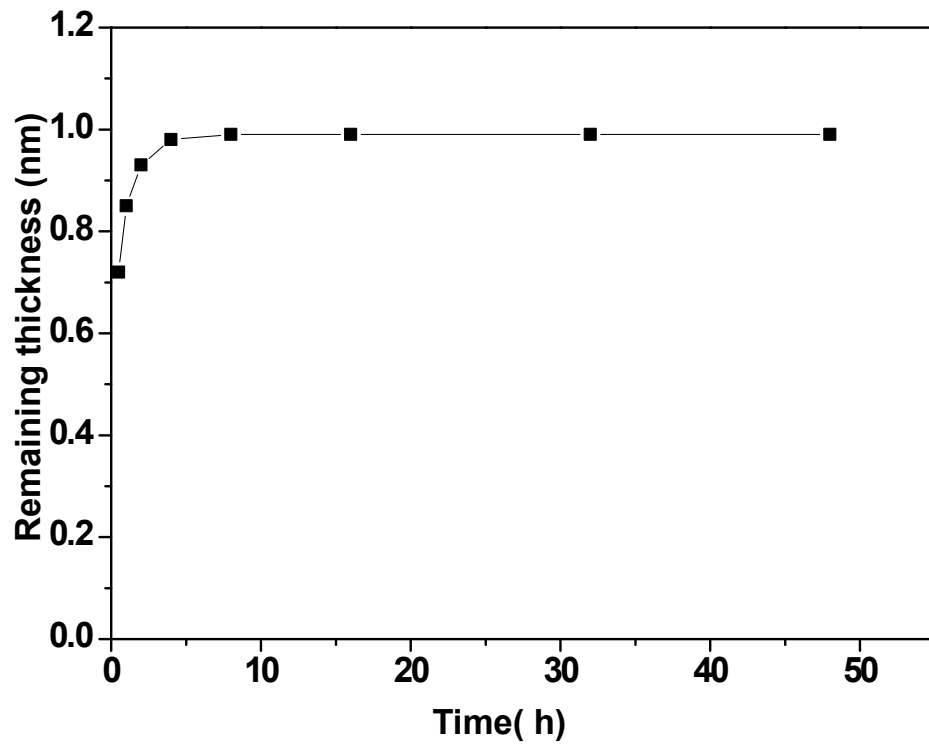

**Figure S2.** The extent of poly (4-acetoxystyrene) cross-linking as quantified by the normalized residual film thickness as a function of the thermal annealing time.

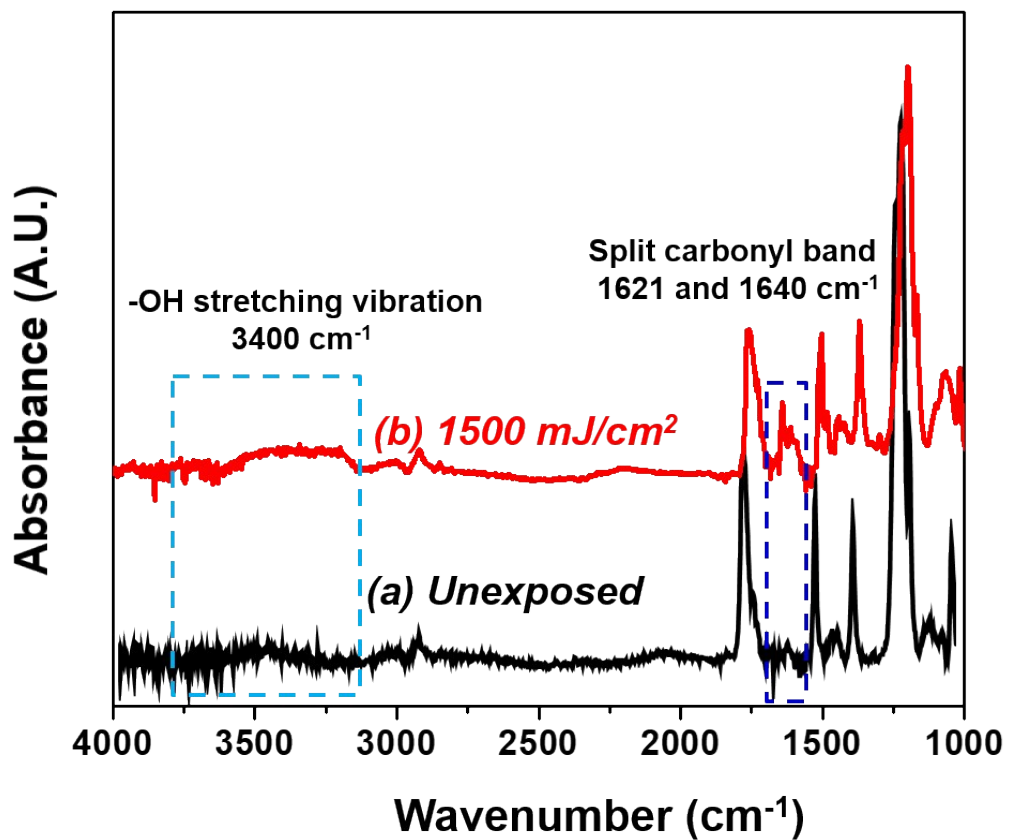

**Figure S3.** GATR FTIR spectra of thin films of poly(4-acetoxystyrene) thin film after exposure to UV nm light at dose of  $1500 \text{ mJ/cm}^2$ .

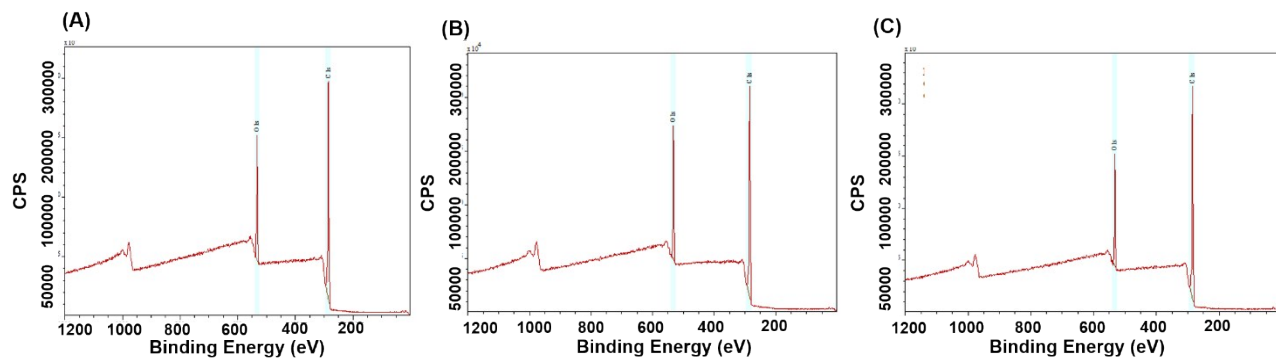

**Figure S4.** XPS survey scan spectra of poly(4-acetoxystyrene thin films before (A) and after illumination with UV-light (B), followed by posttreatment with benzoyl chloride (C).

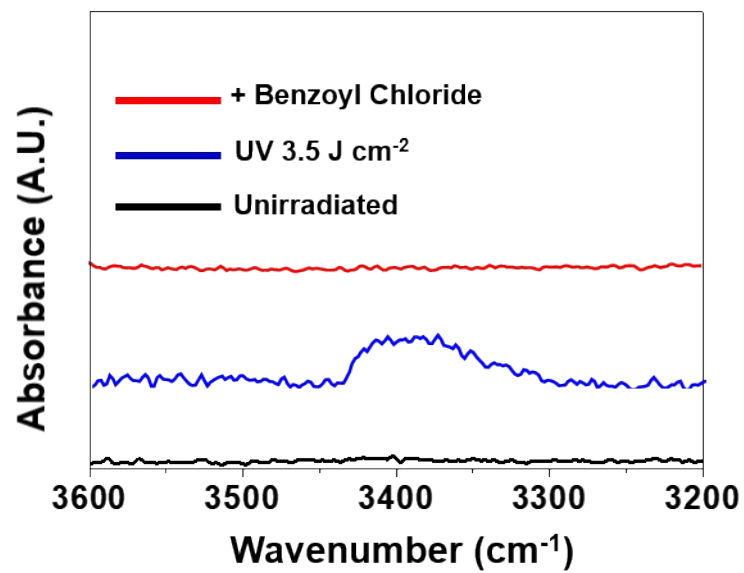

**Figure S5.** GATR spectra from 3200-3600 cm<sup>-1</sup> of poly(4-acetoxystyrene) before and after illumination with UV-light, followed by post treatment with benzoyl chloride.

**Table S1.** Contact Angle ( $\theta$ ) for poly(4-acetoxystyrene) after post-exposure modification with mixtures of acetyl chloride and 1-naphthoyl chloride at different ratios.

| F1-naphthoyl chloride | 0 mol%           | 20 mol%          | 32 mol%          | 48 mol%          | 64 mol%          | 78 mol%          | 100 mol%         |
|-----------------------|------------------|------------------|------------------|------------------|------------------|------------------|------------------|
| $\theta_{H_2O}$       | $75.1 \pm 0.8$ ° | $77.4 \pm 0.6$ ° | $79.2 \pm 0.3$ ° | $81.8 \pm 0.2$ ° | $84.3 \pm 0.5$ ° | $86.3 \pm 0.5$ ° | $88.5 \pm 0.7$ ° |
| $\theta_{CH_2I_2}$    | $31.2 \pm 0.2$ ° | $33.8 \pm 0.9$ ° | $35.3 \pm 0.5$ ° | $37.8 \pm 0.3$ ° | $38.4 \pm 0.7$ ° | $39.6 \pm 0.2$ ° | $41.4 \pm 0.8$ ° |

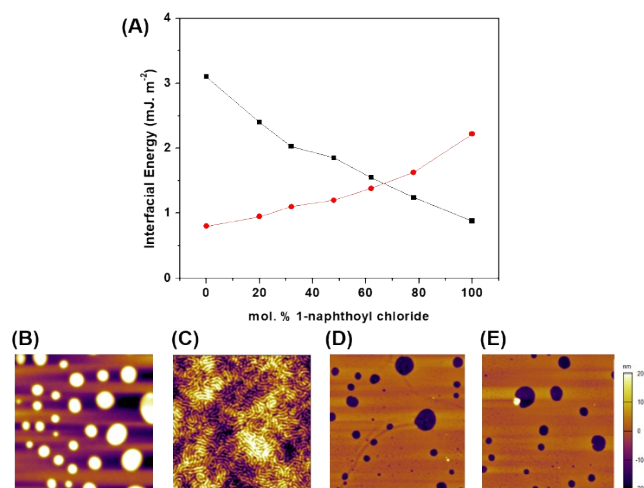

**Figure S6.** (A) Interfacial energies of PS (black) and PMMA (red) blocks against the post-exposure modified poly(4-acetoxystyrene) substrate plotted against 1-naphthoyl chloride content. AFM height images of PS-*b*-PMMA films annealed at 190 °C for 24h in vacuum placed on modified substrates at different 1-naphthoyl chloride content 0 mol% (B), 64% mol (C), 78% mol (D), 100% mol (E). The film thickness of PS-*b*-PMMA thin film was 1.7 L0.

An alternative method for achieving control of surface energy of the substrate is to functionalize the irradiated poly(4-acetoxystyrene) with specific mixtures of acid chlorides of dissimilar intrinsic surface activity. As a proof-of-principle, mixtures of acetyl chloride and 1-naphthoyl chloride were used to functionalise poly(4-acetoxystyrene) films exposed to UV light (3.5 J cm<sup>-2</sup>) at which dose the maximum yield of hydroxyketone groups was achieved. Table S1 lists the contact angles of poly(4-acetoxystyrene) films modified in this manner. The water contact angles of the modified substrate were found to increase with increasing content of 1-naphthoyl chloride (Table S1), as the naphthyl ester is more hydrophobic than the methyl ester.<sup>1</sup> As shown in Figure S5A, the estimated interfacial energies of PS and PMMA are almost equal when the content of 1-naphthoyl chloride in the mixtures varies from 58-78 mol %. It was shown that the films post-modified with pure acetyl chloride were preferentially wet by PMMA block, i.e. similar to the unexposed films (Figure S5B). A reasonable explanation for the wetting behaviour of the PS-*b*-PMMA thin films is the regeneration of acetoxy groups after post-modification. Perpendicular orientation of the annealed PS-*b*-PMMA was observed when the content of 1-naphthoyl chloride in the reaction mixture was 64 mol % (Figure S5C). In contrast, a “hole” morphology were observed at higher 1-naphthoyl chloride contents as a result of stronger hydrophobicity and higher carbon content of the naphthoyl-substituted groups.<sup>2</sup> These results demonstrate that poly(4-acetoxystyrene) can be used as a substrate for tuning BCP nanodomain orientation, either by controlling the UV exposure dose, or the composition of the mixture of acid chlorides used in the subsequent functionalization step.

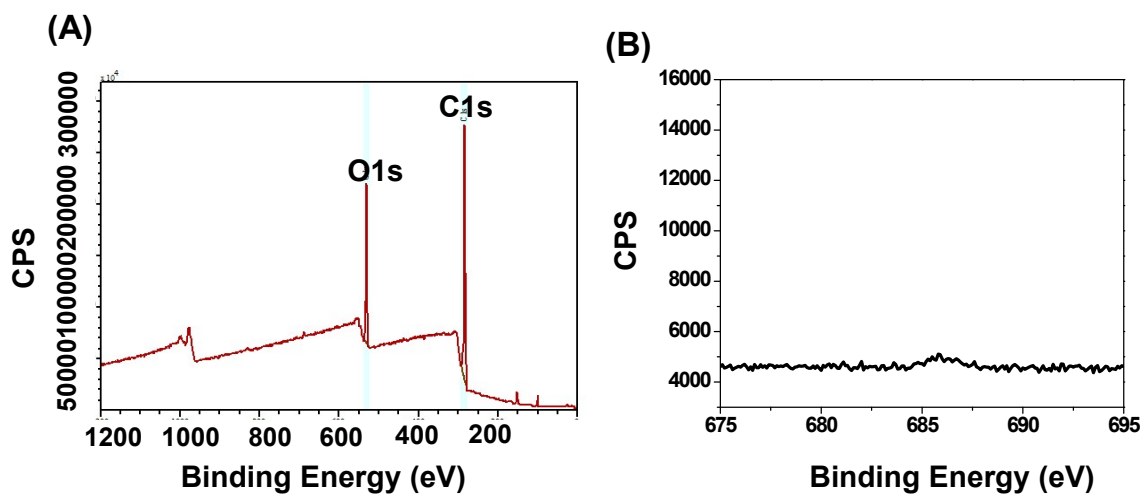

**Figure S7.** XPS survey scan (A) and high resolution XPS F1s (B) of original poly(4-acetoxystyrene) thin film without e-beam irradiation after treatment with pentafluorophenylhydrazine.

## Reference

1. R. R. Thomas and L. E. Stephans, *J. Colloid. Interface Sci.*, 2002, **251**, 339.
2. Y. Pang, L. Wan, G. Huang, X. Zhang, X. Jin, P. Xu, Y. Liu, M. Han, G.-P. Wu and S. Ji, *Macromolecules*, 2017, **50**, 6733.
